# Supplementary material for: Transcriptome Analysis Revealed Potential Genes of Skeletal Muscle Thermogenesis in Mashen Pigs and Large White Pigs under Cold Stress
Source: MDPI journal article supplement (doi:10.3390/ijms242115534), 2023-10-24

**Figure S1.** Average daily feed intake statistics. LW and MS represent Large White pigs and Mashen pigs, respectively; 25 and 4 indicate 25°C and 4°C, respectively.

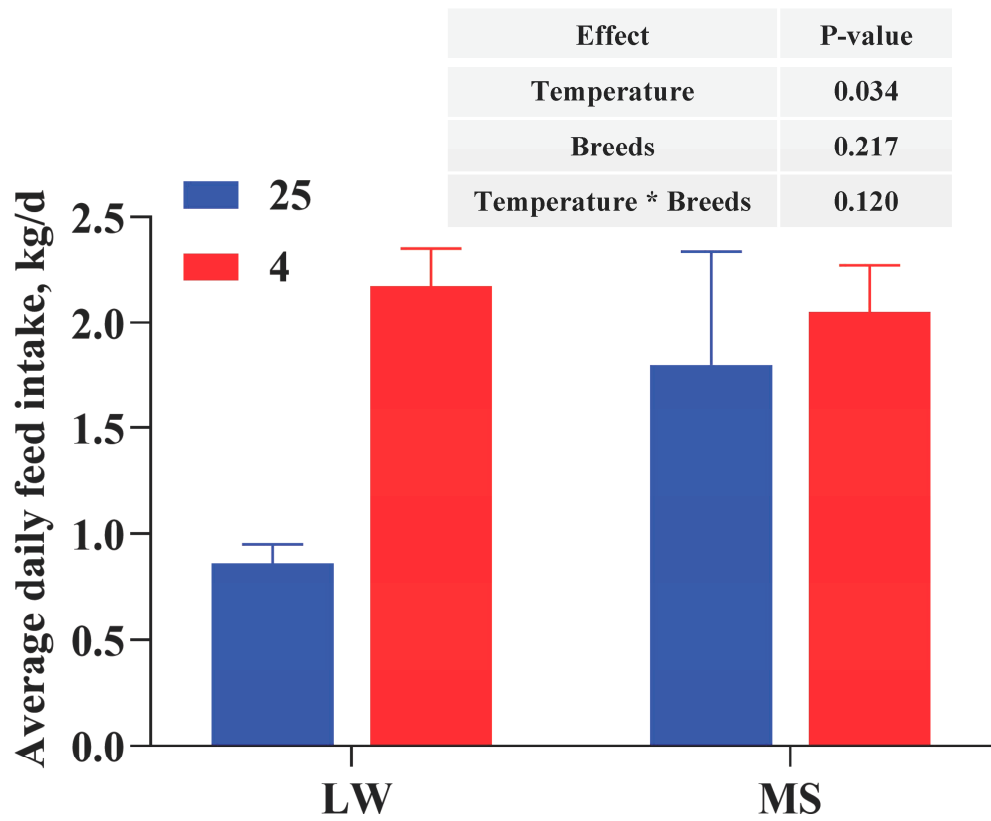

**Figure S2.** All DEGs in the transcriptome sequencing data in LW and MS pigs at 25°C and 4°C. (A) Cluster map of DEGs between LW-25 and MS-25 groups. (B) Cluster map of DEGs between LW-4 and MS-4 groups. (C) Cluster map of DEGs between LW-25 and LW-4 groups. (D) Cluster map of DEGs between MS-25 and MS-4 groups. (E) Volcanic map of DEGs between LW-25 and LW-4 groups. (F) Venn diagram of 4 groups. (G) The number of up-regulated and down-regulated between LW-25 and LW-4 groups. (H) The number of up-regulated and down-regulated between MS-25 and MS-4 groups. (I) GO enrichment analysis of specific DEGs between LW-25 and LW-4 groups. (J) KEGG pathway classification of specific DEGs between LW-25 and LW-4 groups. LW and MS represent Large White pigs and Mashed pigs, respectively; 25 and 4 indicate 25°C and 4°C, respectively.

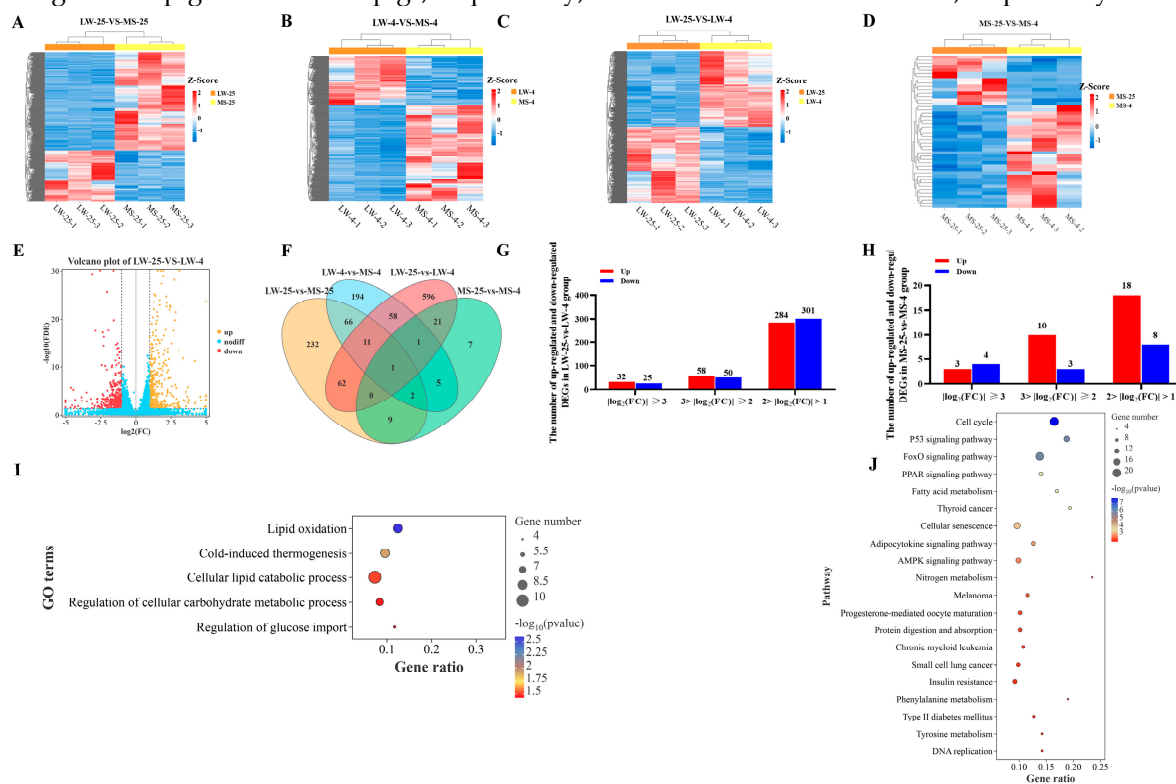

**Figure S3.** Weighted co-expression network analysis. **(A)** The results of soft threshold  $\beta$  calculation indicated a scale-free network linear model, with network connectivity corresponding to different soft thresholds. The blue line represents a correlation coefficient of 0.8, and the red line represents a correlation coefficient of 0.9. **(B)** Clustering of module eigengenes.

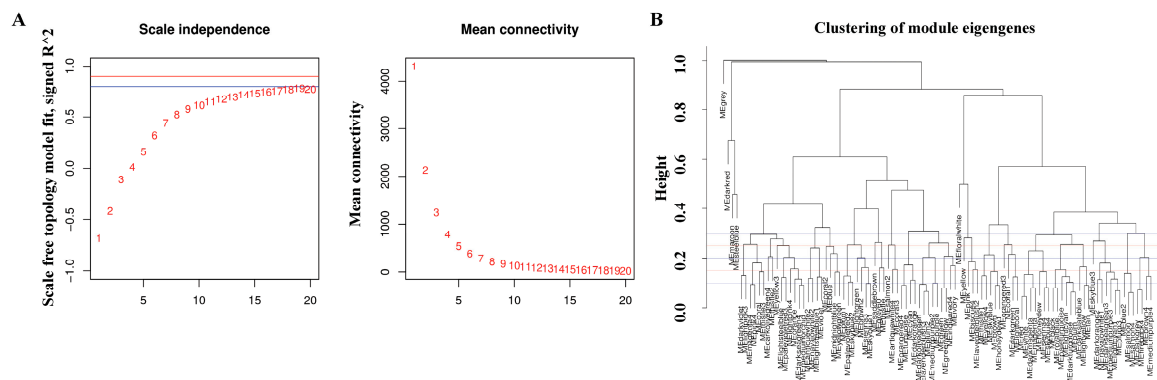

**Figure S4. (A–K)** qRT-PCR verification on thermogenesis and energy metabolism of longissimus dorsi in LW and MS pigs at 25°C and 4°C. LW and MS represent Large White pigs and Mashen pigs, respectively. \*\*  $p < 0.01$  and \*  $p < 0.05$ .

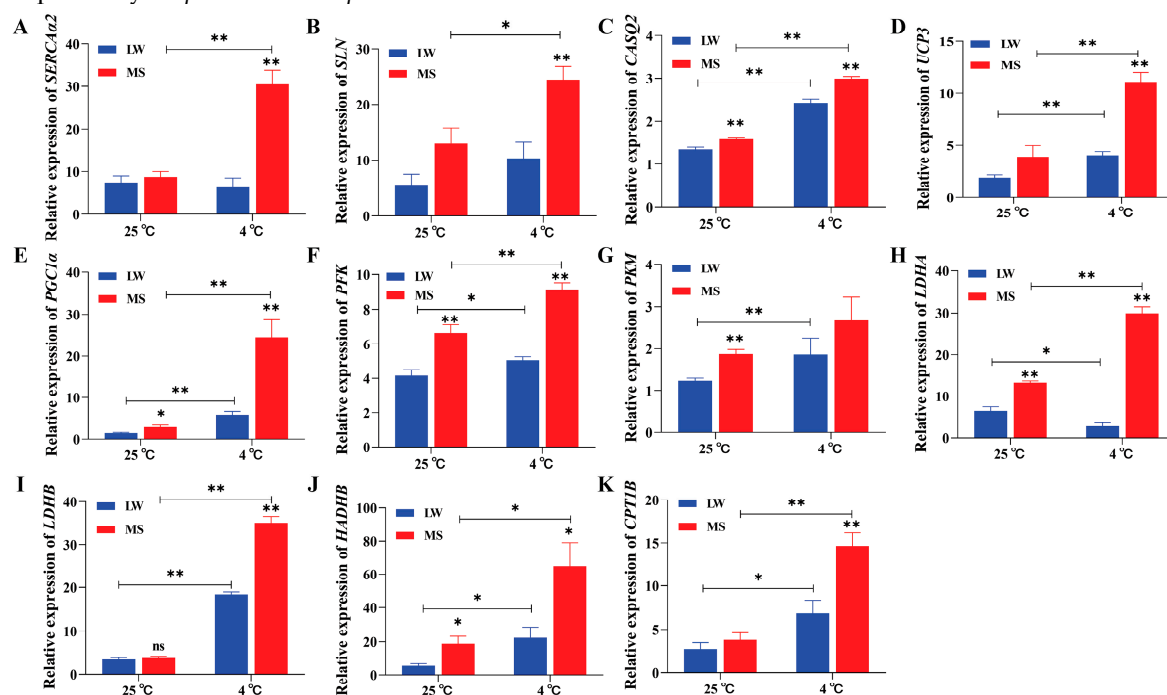

**Figure S5.** Protein statistical results. **(A)** Western blot statistical results of candidate genes in longissimus dorsi muscle tissues of LW and MS pigs at 25°C and 4°C. **(B)** Statistical results of heat production and energy metabolism related proteins in porcine skeletal muscle satellite cells interfered with PRSS8. LW and MS represent Large White pigs and Mashen pigs, respectively. \*\*  $p < 0.01$  and \*  $p < 0.05$ .

**A**

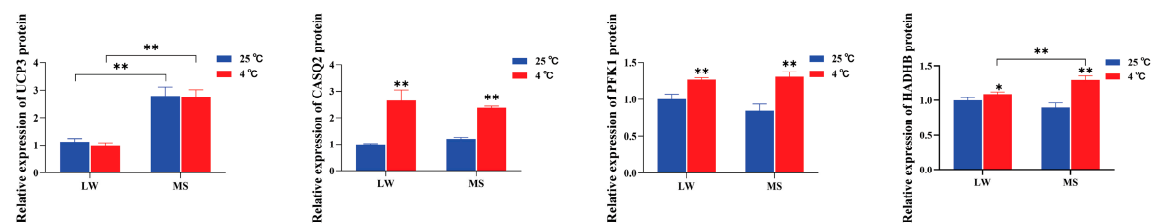

**B**

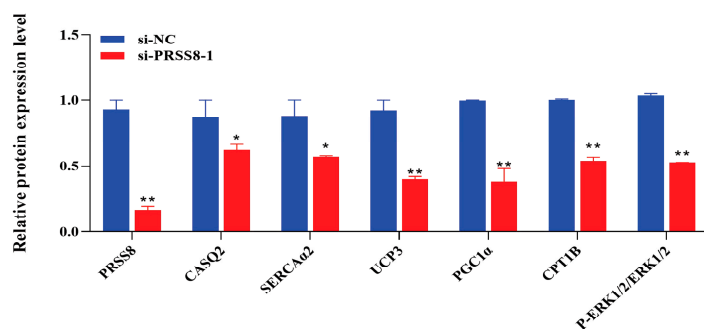

Supplement: s1 [file s1]
